# Supplementary figures and images for: The Response of Beech (Fagus sylvatica L.) Populations to Climate in the Easternmost Sites of Its European Distribution
Source: MDPI journal article supplement (doi:10.3390/plants11233310), 2022-11-30

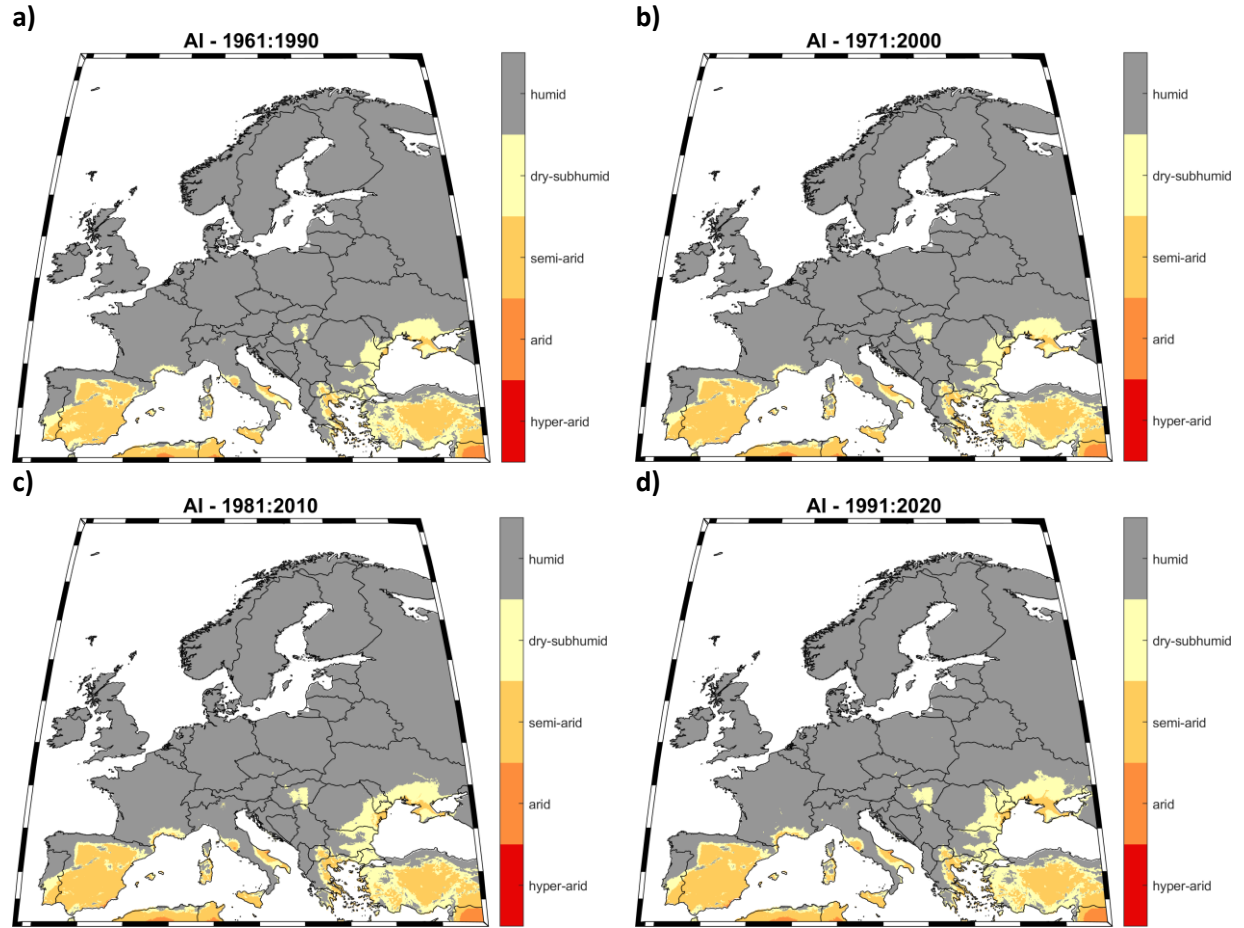

**Figure S1.** Aridity Index (AI) over different climatological periods: a) 1961 – 1990; b) 1971 – 2000; c) 1981 – 2010 and d) 1991-2020

Supplement: s1 [file s1]
